# Supplementary material for: MiR-182 Is Upregulated in Prostate Cancer and Contributes to Tumor Progression by Targeting MITF
Source: MDPI journal article supplement (doi:10.3390/ijms24031824), 2023-01-17
Supplement: s1 [file s1]

**SUPPLEMENTARY DATA.** *Stafford & McKenna, MiR-182 Is Upregulated in Prostate Cancer and Contributes to Tumor Progression by Targeting MITF*

**Table S1. Functional enrichment analysis of miR-182 related to TGF- $\beta$  signaling**

Table shows the significant association of miR-182 target genes with Gene Set descriptions related to TGF- $\beta$  signaling. Analysis performed using clusterProfiler in CancerMIRNome.

| Knowledge base                          | Gene Set ID | Description                                                                          | Count / List Total | <i>p</i> -value       | Adjusted <i>p</i> -value <sup>1</sup> | Gene Symbol                                                     |
|-----------------------------------------|-------------|--------------------------------------------------------------------------------------|--------------------|-----------------------|---------------------------------------|-----------------------------------------------------------------|
| <b>TGF-<math>\beta</math> signaling</b> |             |                                                                                      |                    |                       |                                       |                                                                 |
| GO-BP                                   | GO:0030511  | Positive regulation of transforming growth factor beta receptor signaling pathway    | 4/179              | $1.15 \times 10^{-4}$ | $6.64 \times 10^{-3}$                 | EP300; SMAD4; THBS1; CITED2                                     |
|                                         | GO:1903846  | Positive regulation of cellular response to transforming growth factor beta stimulus | 4/179              | $1.15 \times 10^{-4}$ | $6.64 \times 10^{-3}$                 | EP300; SMAD4; THBS1; CITED2                                     |
|                                         | GO:0071560  | Cellular response to transforming growth factor beta stimulus                        | 9/179              | $3.64 \times 10^{-4}$ | $1.02 \times 10^{-2}$                 | EP300; CREB1; SMAD4; ACVR1B; THBS1; CITED2; NR3C1; ZFP36L1; LOX |
|                                         | GO:0071559  | Response to transforming growth factor beta                                          | 9/179              | $4.33 \times 10^{-4}$ | $1.17 \times 10^{-2}$                 | EP300; CREB1; SMAD4; ACVR1B; THBS1; CITED2; NR3C1; ZFP36L1; LOX |
|                                         | GO:0007179  | Transforming growth factor beta receptor signaling pathway                           | 7/179              | $1.91 \times 10^{-3}$ | $3.18 \times 10^{-2}$                 | EP300; CREB1; SMAD4; ACVR1B; THBS1; CITED2; LOX                 |

GO-BP = Gene Ontology-Biological Process. <sup>1</sup> Adjusted *p*-value for multiple hypothesis correction used Benjamini and Hochberg procedure.

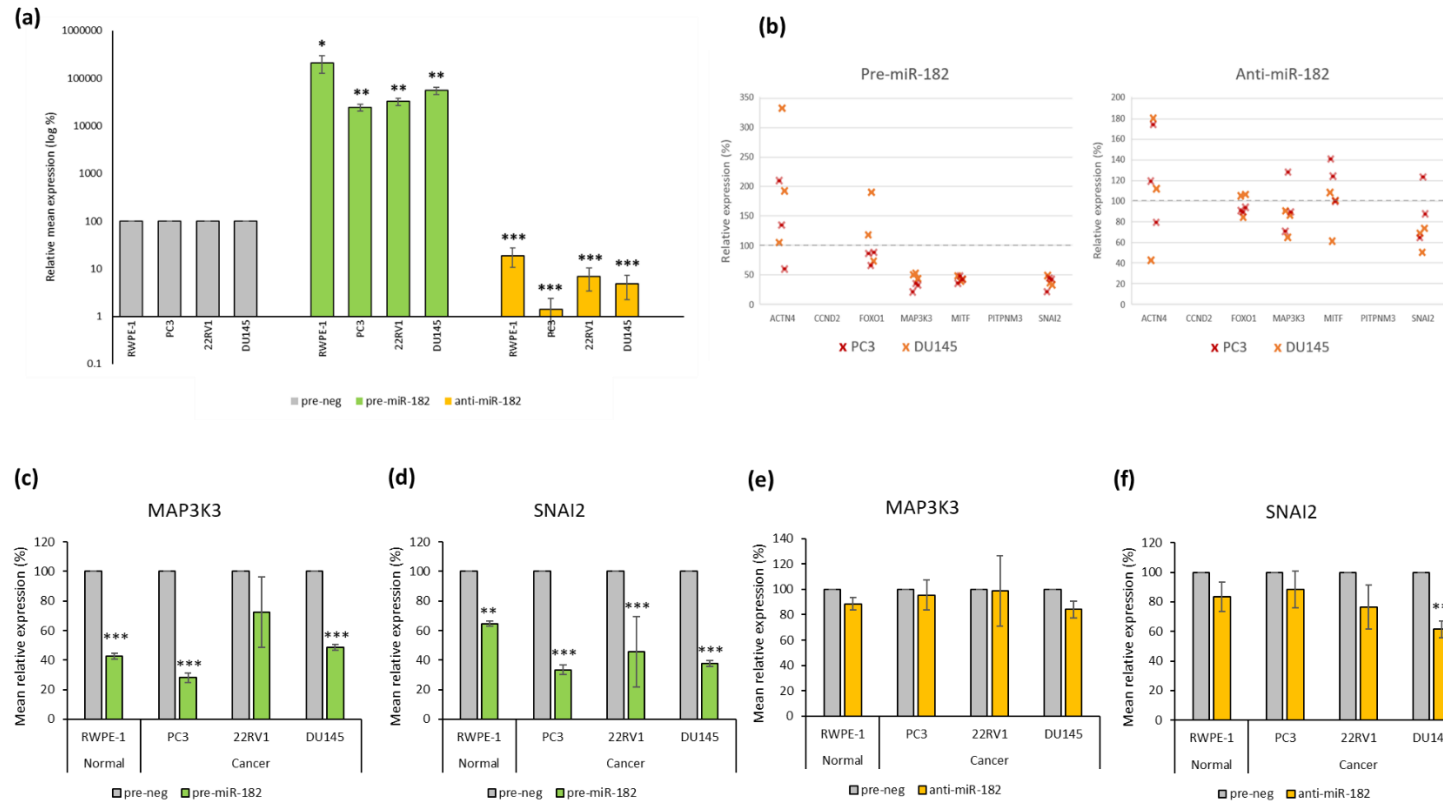

**Figure S1.** Effect of miR-182 expression on candidate targets. (a) RT-qPCR expression results of miR-182 48 hours post-transfection confirmed successful transfection of pre-miR-182 and anti-miR-182 in all cell-lines, where miR-182 was significantly upregulated (green) and downregulated (yellow) respectively, compared to control transfected cells ( $n = 4$ , pre-neg: negative control, housekeeping: Snord48). (b) In vitro preliminary RT-qPCR results of the 7 candidate targets. In pre-miR-182 transfected PC3 and DU145 cells, MAP3K3, MITF and SNAI2 expressions were consistently decreased, while ACTN4 and FOXO1 showed a wide range of expressions. In anti-miR-182 transfected cells, results were less consistent. CCND2 and PITPNM3 were undetectable in both cell lines ( $n = 3$  per cell-line, each data point = one replicate vs pre-neg result normalised to 100%; housekeeping: ACTB). RT-qPCR shows over-expression of miR-182 causes significant down-regulation of (c) MAP3K3 and (d) SNAI2 in normal and cancerous prostate cell-lines ( $n = 4$ ; housekeeping: ACTB). However, RT-qPCR ( $n = 4$ ) shows inhibition of miR-182 does not cause up-regulation of (e) MAP3K3 and (f) SNAI2 in normal and cancerous prostate cell-lines ( $n = 4$ ; housekeeping: ACTB). For all bar graphs, p-values generated by paired  $t$ -test (\* $p < 0.05$ , \*\* $p < 0.01$ , \*\*\* $p < 0.001$ ).

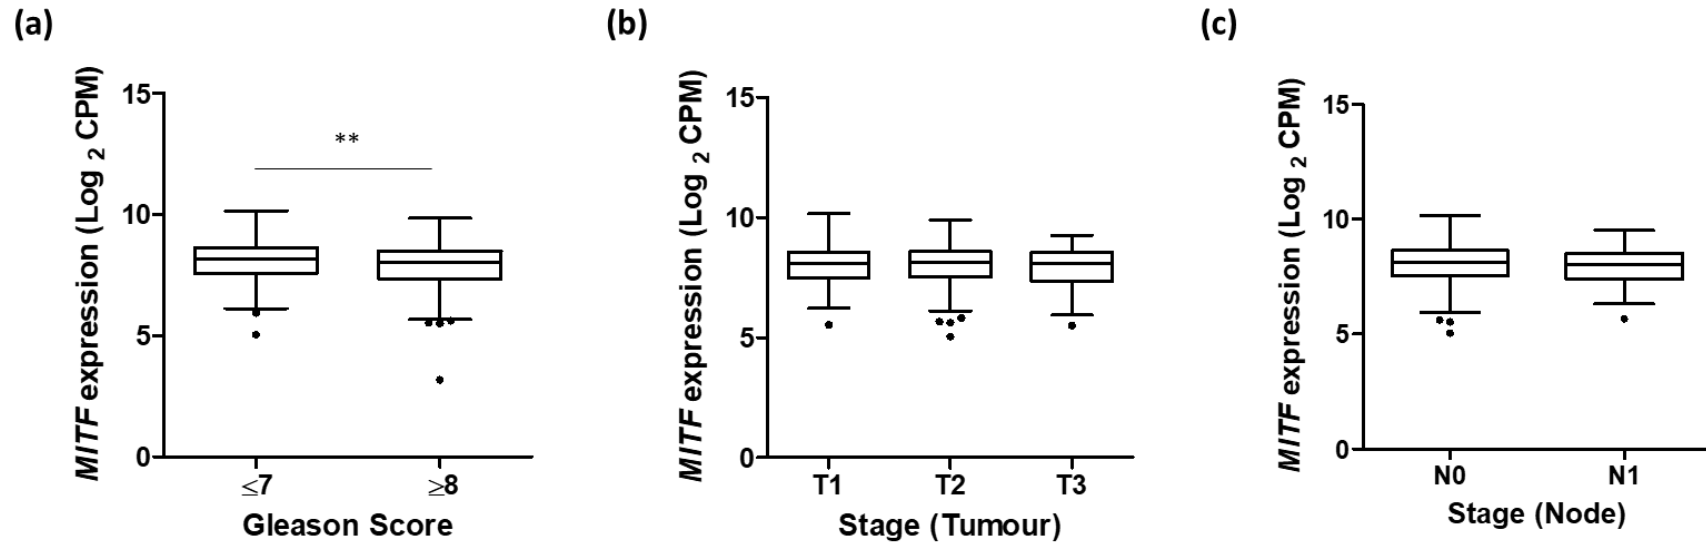

**Figure S2.** Correlation between MITF expression and clinicopathological markers of PCa progression

UCSC Xena analysis of TCGA PRAD samples shows expression of *MITF* is significantly lower in patients (a) with Gleason score  $\geq 8$  ( $n = 213$ ) compared to those scored  $\leq 7$  ( $n = 337$ ). There was no significant association between MITF expression and (b) pathological T-stage ( $n$ , T1 = 199, T2 = 190, T3 = 56) (One-way ANOVA with multiple comparison tests,  $p = \text{ns}$ ) or (c) pathological N stage ( $n$ , N0 = 317, N1 = 66) (Welch's  $t$ -test,  $p = \text{ns}$ ). All Boxplots show mean and Tukey whiskers.  $n$ , number; ns, non-significant.

**Table S2.** STRING functional enrichment analysis of MITF protein network using KEGG annotation. Table shows top 20 significantly enriched items ranked by Enrichment strength (ES)(Adjusted  $p$ -value < 0.05). Results are dominated by cancer-related annotations, including PCa (red), and EMT-related pathways (green) and function (purple).

| ID       | Description                                     | Count in network | ES   | Adjusted $p$ -value <sup>1</sup> | Protein labels                                   |
|----------|-------------------------------------------------|------------------|------|----------------------------------|--------------------------------------------------|
| hsa05219 | Bladder cancer                                  | 4 of 41          | 1.96 | $1.83 \times 10^{-6}$            | MAPK1, MDM2, MAP2K2, MAPK3                       |
| hsa05211 | Renal cell carcinoma                            | 6 of 66          | 1.93 | $4.97 \times 10^{-9}$            | MAPK1, CREBBP, MAP2K2, MAPK3, EP300, TFE3        |
| hsa05216 | Thyroid cancer                                  | 3 of 36          | 1.89 | $6.92 \times 10^{-5}$            | MAPK1, MAP2K2, MAPK3                             |
| hsa04720 | Long-term potentiation                          | 5 of 64          | 1.86 | $2.19 \times 10^{-7}$            | MAPK1, CREBBP, MAP2K2, MAPK3, EP300              |
| hsa05221 | Acute myeloid leukaemia                         | 5 of 66          | 1.85 | $2.36 \times 10^{-7}$            | MAPK1, RPS6KB1, SPI1, MAP2K2, MAPK3              |
| hsa04916 | Melanogenesis                                   | 7 of 95          | 1.84 | $1.55 \times 10^{-9}$            | MAPK1, CREBBP, MAP2K2, MAPK3, EP300, MITF, CREB1 |
| hsa05215 | <b>Prostate cancer</b>                          | 7 of 96          | 1.83 | $1.55 \times 10^{-9}$            | MAPK1, MDM2, CREBBP, MAP2K2, MAPK3, EP300, CREB1 |
| hsa05218 | Melanoma                                        | 5 of 72          | 1.81 | $3.15 \times 10^{-7}$            | MAPK1, MDM2, MAP2K2, MAPK3, MITF                 |
| hsa04350 | <b>TGF-<math>\beta</math> signaling pathway</b> | 6 of 91          | 1.79 | $2.71 \times 10^{-8}$            | MAPK1, RPS6KB1, SMAD2, CREBBP, MAPK3, EP300      |
| hsa05210 | Colorectal cancer                               | 5 of 82          | 1.75 | $5.24 \times 10^{-7}$            | MAPK1, RPS6KB1, SMAD2, MAP2K2, MAPK3             |
| hsa04520 | <b>Adherens junction</b>                        | 4 of 67          | 1.75 | $8.95 \times 10^{-6}$            | MAPK1, CREBBP, MAPK3, EP300                      |
| hsa04066 | <b>HIF-1 signaling pathway</b>                  | 6 of 106         | 1.72 | $5.19 \times 10^{-8}$            | MAPK1, RPS6KB1, CREBBP, MAP2K2, MAPK3, EP300     |
| hsa04068 | <b>FoxO signaling pathway</b>                   | 7 of 127         | 1.71 | $3.60 \times 10^{-9}$            | SIRT1, MAPK1, MDM2, CREBBP, MAP2K2, MAPK3, EP300 |
| hsa05214 | Glioma                                          | 4 of 72          | 1.71 | $1.11 \times 10^{-5}$            | MAPK1, MDM2, MAP2K2, MAPK3                       |
| hsa05212 | Pancreatic cancer                               | 4 of 73          | 1.71 | $1.14 \times 10^{-5}$            | MAPK1, RPS6KB1, SMAD2, MAPK3                     |
| hsa05220 | Chronic myeloid leukaemia                       | 4 of 75          | 1.70 | $1.23 \times 10^{-5}$            | MAPK1, MDM2, MAP2K2, MAPK3                       |
| hsa04960 | Aldosterone-regulated sodium reabsorption       | 2 of 37          | 1.70 | 0.0028                           | MAPK1, MAPK3                                     |
| hsa01522 | Endocrine resistance                            | 5 of 95          | 1.69 | $8.74 \times 10^{-7}$            | MAPK1, RPS6KB1, MDM2, MAP2K2, MAPK3              |
| hsa04370 | <b>VEGF signaling pathway</b>                   | 3 of 57          | 1.69 | 0.00021                          | MAPK1, MAP2K2, MAPK3                             |
| hsa05213 | Endometrial cancer                              | 3 of 57          | 1.69 | 0.00021                          | MAPK1, MAP2K2, MAPK3                             |

<sup>1</sup>Adjusted  $p$ -value for multiple hypothesis correction used Benjamini and Hochberg procedure.

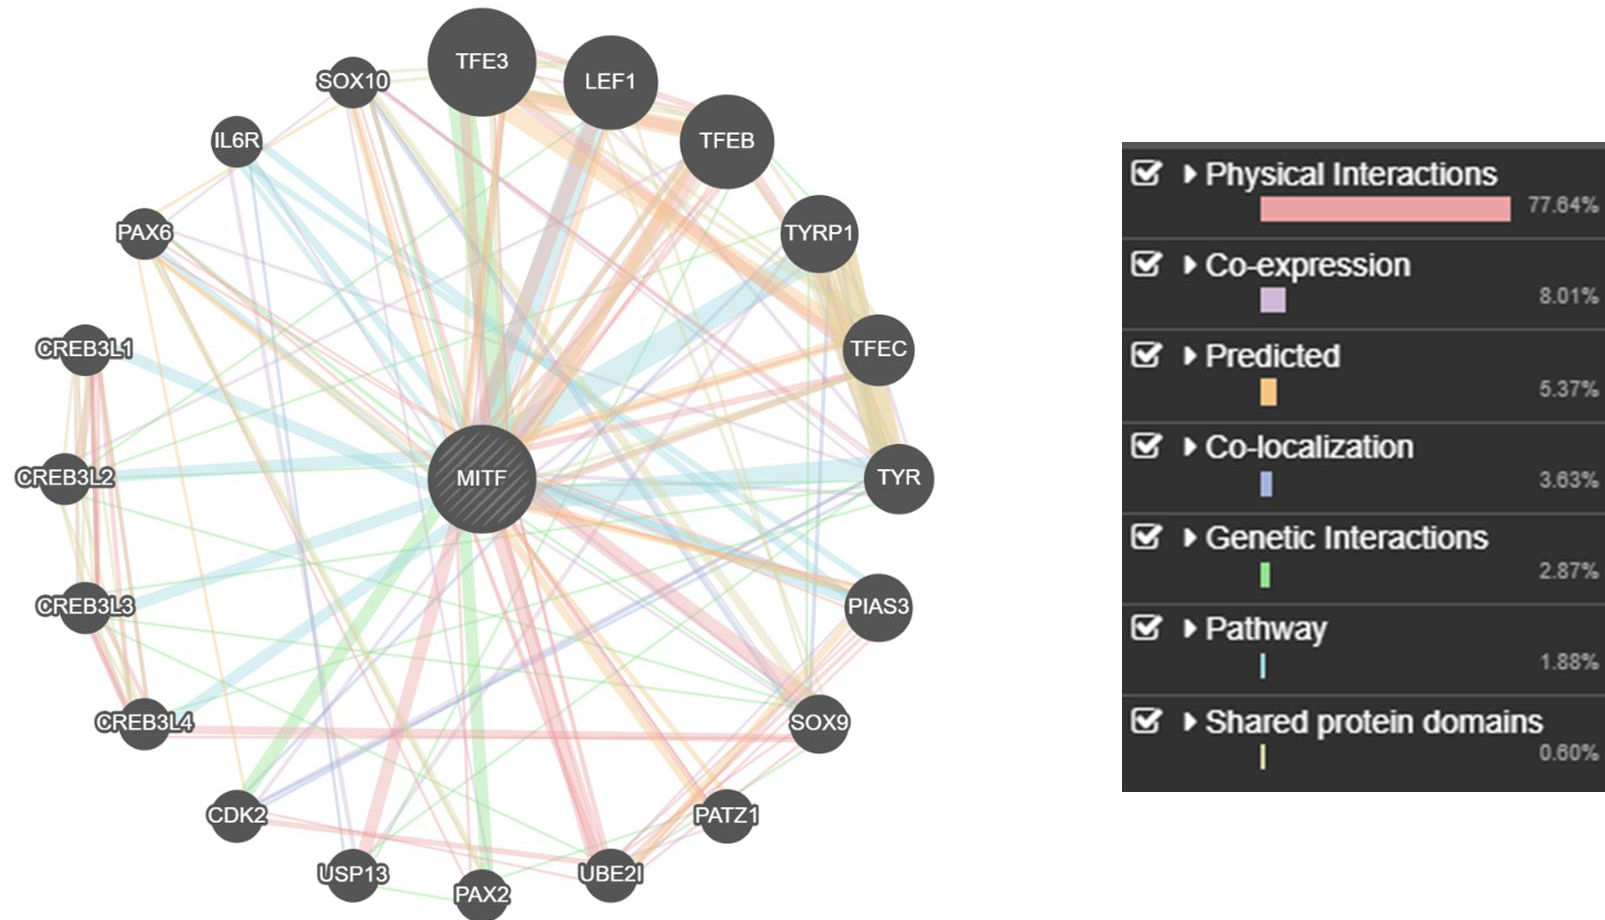

**Figure S3.** Network analysis of MITF interactions. Visualization by GeneMANIA.

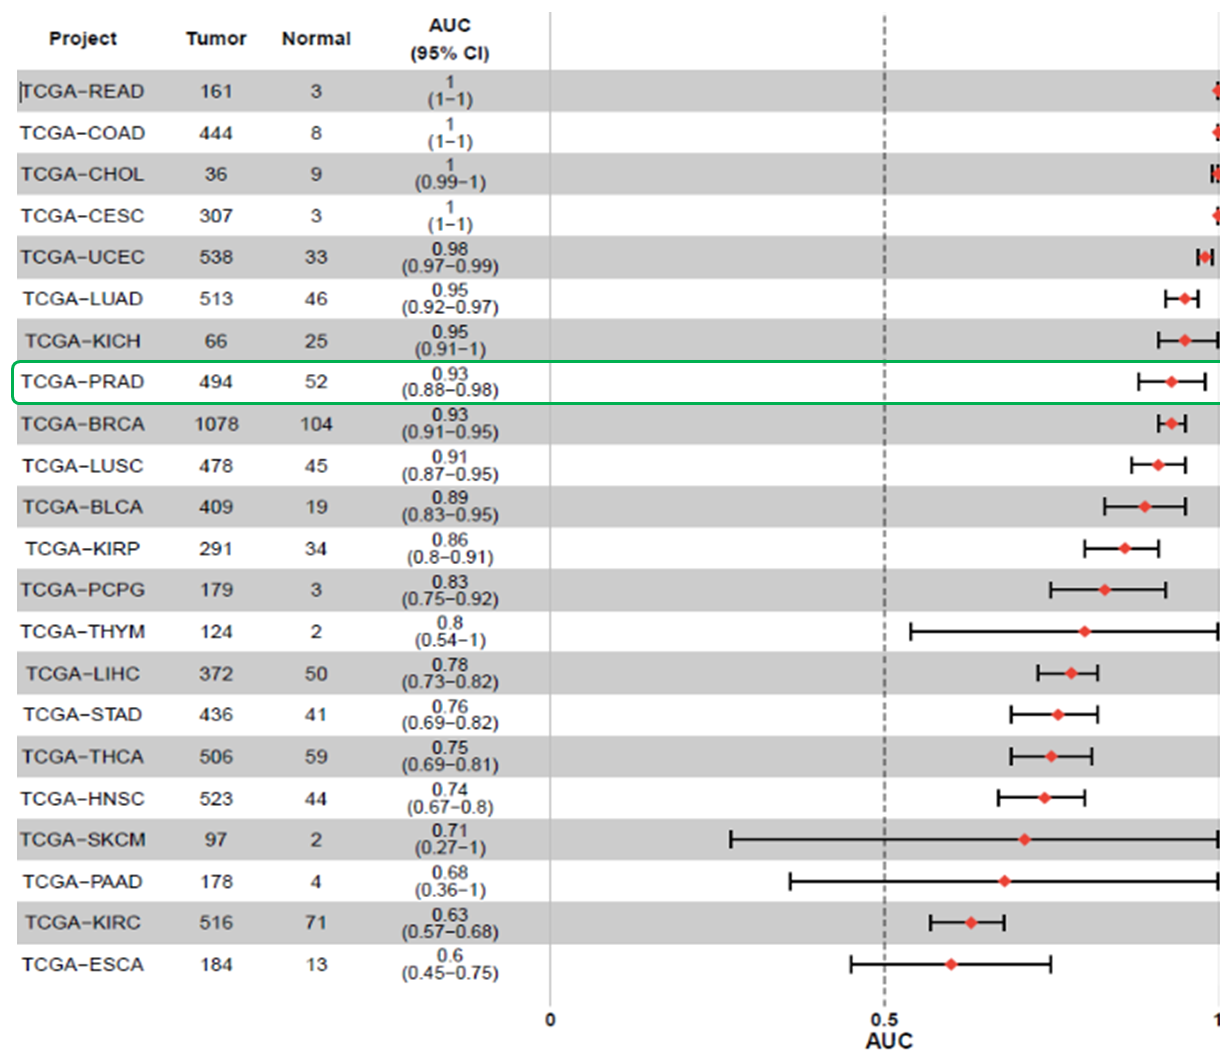

**Figure S4.** CancerMIRNome TCGA Pan-Cancer ranked forest plots of miR-182-5p ROC analysis revealed in general that miR-182-5p has significant diagnostic value in multiple cancer types (AUC = 0.6 - 1.0). Result for PCa is enclosed in green circle (TCGA-PRAD).

AUC: Area under the curve; OS: Overall survival; ROC: Receiver operating characteristic; BLCA: Bladder urothelial carcinoma; BRCA: Breast invasive carcinoma; CESC: Cervical squamous cell carcinoma and endocervical adenocarcinoma; CHOL: Cholangiocarcinoma; COAD: Colon adenocarcinoma; ESCA: Esophageal carcinoma; HNSC: Head and neck squamous cell carcinoma; KICH: Kidney chromophobe; KIRC: Kidney renal clear cell carcinoma; KIRP: Kidney renal papillary cell carcinoma; LIHC: Liver hepatocellular carcinoma; LUAD: Lung adenocarcinoma; LUSC: Lung squamous cell carcinoma; PAAD: Pancreatic adenocarcinoma; PCPG: Pheochromocytoma and paraganglioma; PRAD: Prostate adenocarcinoma; READ: Rectal adenocarcinoma; SKCM: Skin cutaneous melanoma; STAD: Stomach adenocarcinoma; THCA: Thyroid carcinoma; THYM: Thymoma; UCEC: Uterine corpus endometrial carcinoma

**Table S3** KM plotter meta-analysis results of overall survival in various cancers comparing high/low expression of miR-182 and MITF. Table included results with log-rank  $p < 0.05$ . HR estimated for high compared to low expression (Cox proportional analysis, auto-selected cut-off).

|                | <i>Cancer</i>                         | <i>n</i> | <i>HR*</i> | <i>Log-rank<br/>p-value</i> |
|----------------|---------------------------------------|----------|------------|-----------------------------|
| <i>miR-182</i> | Breast cancer                         | 1076     | 0.70       | 0.035                       |
|                | Head-neck squamous cell carcinoma     | 522      | 0.70       | 0.013                       |
|                | Kidney renal clear cell carcinoma     | 516      | 1.94       | $2.2 \times 10^{-5}$        |
|                | Kidney renal papillary cell carcinoma | 290      | 0.52       | 0.037                       |
|                | Liver hepatocellular carcinoma        | 371      | 1.56       | 0.012                       |
|                | Lung squamous cell carcinoma          | 472      | 0.57       | 0.00016                     |
|                | Sarcoma                               | 259      | 1.78       | 0.0043                      |
|                | Stomach adenocarcinoma                | 431      | 0.68       | 0.012                       |
|                | Uterine corpus endometrial carcinoma  | 537      | 0.51       | 0.0021                      |
| <i>MITF</i>    | Cervical squamous cell carcinoma      | 304      | 0.62       | 0.043                       |
|                | Esophageal adenocarcinoma             | 80       | 0.37       | 0.0028                      |
|                | Kidney renal clear cell carcinoma     | 530      | 0.55       | $8.3 \times 10^{-5}$        |
|                | Kidney renal papillary cell carcinoma | 287      | 0.51       | 0.031                       |
|                | Liver hepatocellular carcinoma        | 370      | 1.54       | 0.016                       |
|                | Lung adenocarcinoma                   | 504      | 0.66       | 0.019                       |
|                | Ovarian cancer                        | 373      | 1.47       | 0.0054                      |
|                | Pancreatic ductal adenocarcinoma      | 177      | 2.09       | 0.0039                      |
|                | Rectum adenocarcinoma                 | 165      | 2.24       | 0.037                       |
|                | Sarcoma                               | 259      | 0.54       | 0.0019                      |
|                | Thymoma                               | 118      | 3.96       | 0.027                       |

\* Red text indicates HR < 1; high expression of miR-182/MITF predicted favourable prognosis; blue text indicates HR > 1; high expression of miR-182/MITF predicted poor prognosis. *n* = number; HR = Hazard ratio; KM = Kaplan-Meier

(a)

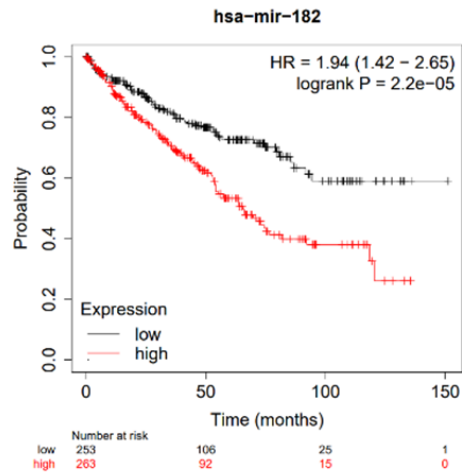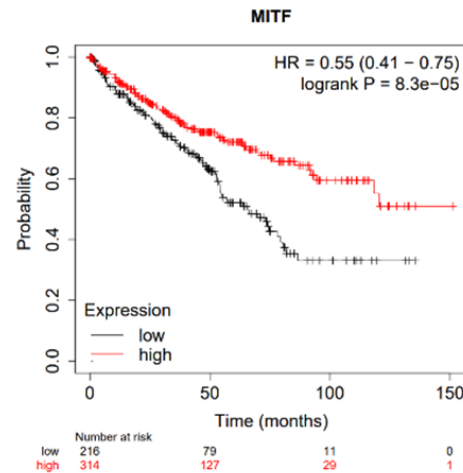

(b)

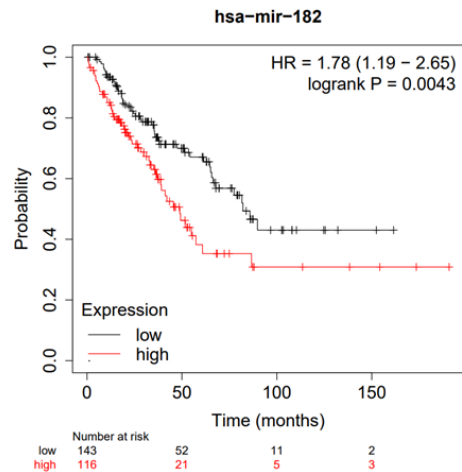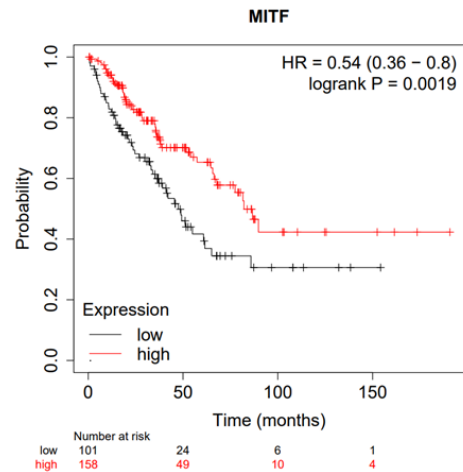

**Figure S5.** KM survival plots showing significant inverse associations between miR-182 and MITF expressions in **(a)** Kidney renal clear cell carcinoma ( $n$ : miR-182 = 516, MITF = 530), and **(b)** Sarcoma ( $n$ : miR-182 = 259, MITF = 259). In both cases, high miR-182 expression is significantly associated with poor prognosis, while high MITF is significantly associated with favourable prognosis. Visualization by KM Plotter.  $n$  = number; KM = Kaplan-Meier



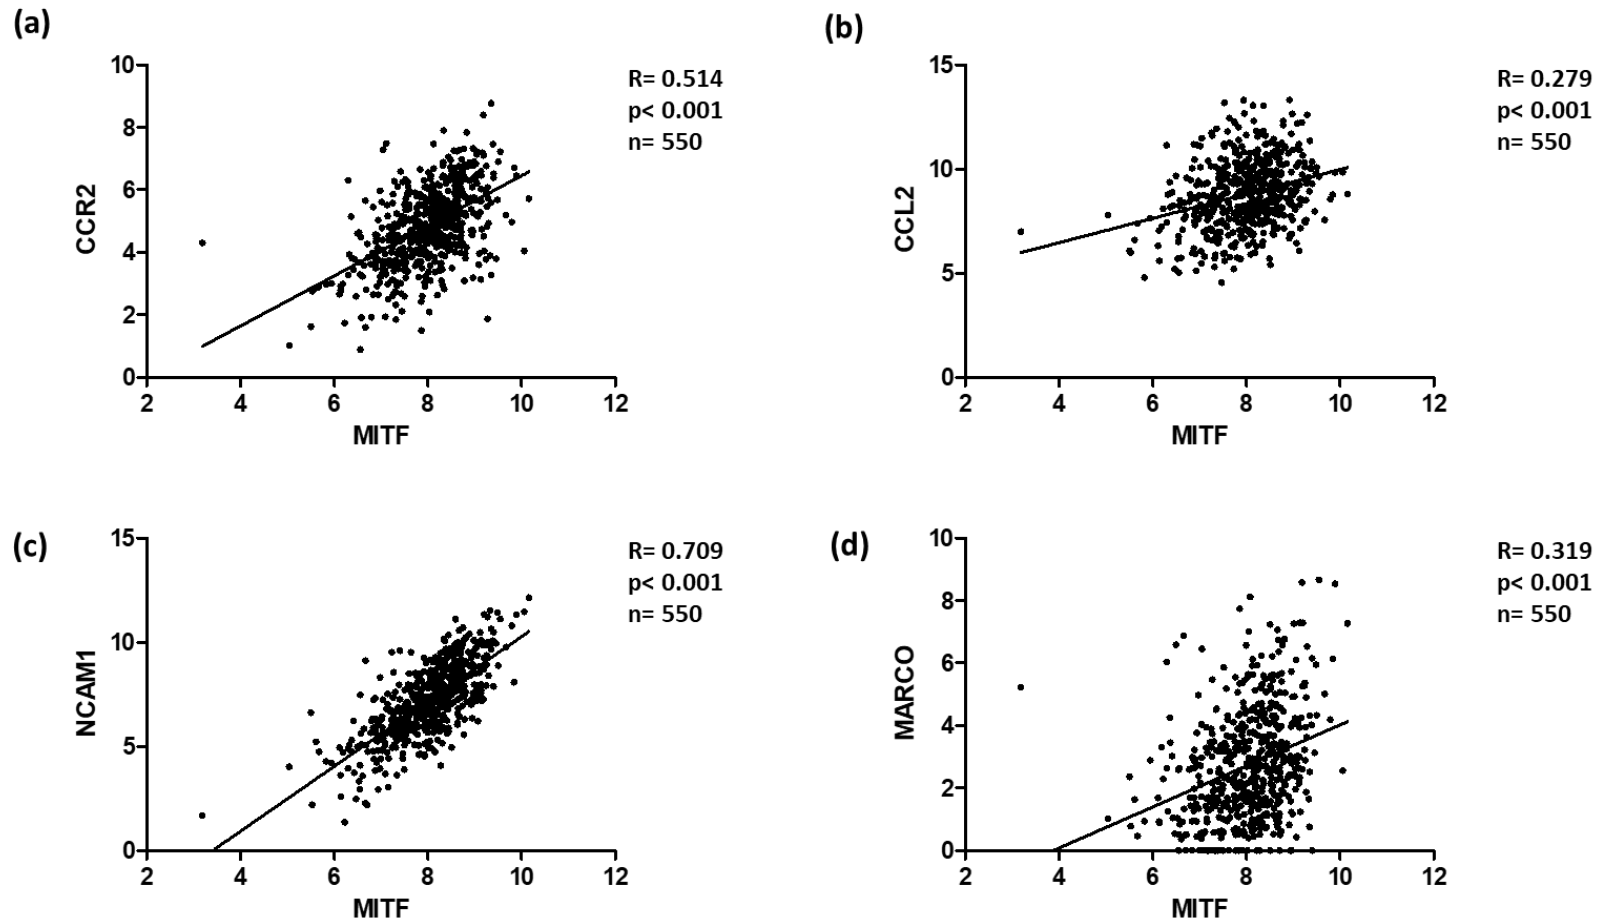

**Figure S6. Correlation of MITF with gene markers of tumor-associated macrophages.** UCSC Xena analysis of TCGA prostate tissue samples ( $n = 550$ ), shows the expression of MITF is significantly positively correlated with (a) CCR2 (b) CCL2 (c) NCAM1 (d) MARCO (Pearson correlation,  $p < 0.001$ ).  $n$  = number

**Table S4.** Diagnostic and prognostic studies of miR-182-5p in prostate cancer.

| miR-182-5p | Source | Diagnostic                                             | Prognostic                                                                                                                              | Reference                             |
|------------|--------|--------------------------------------------------------|-----------------------------------------------------------------------------------------------------------------------------------------|---------------------------------------|
| Up         | Plasma | 65 PCa vs 58 BPH<br>AUC = 0.61<br>( $p = 0.0365$ )     | (NA)                                                                                                                                    | [59]<br><i>Abramovic et al., 2021</i> |
| Up         | Tissue | 82 PCa vs 24 BPH<br>AUC = 0.95<br>( $p < 0.001$ )      | <b>BCR-free survival</b><br>34 AA PCa: HR = 2.93<br>( $p = 0.041$ )<br>22 EA PCa: HR = 0.83<br>( $p = 0.86$ )                           | [60]<br><i>Shiina et al., 2021</i>    |
| Up         | Tissue | 98 PCa vs 15 Normal<br>AUC=0.81<br>( $p = 0.0001$ )    | (NA)                                                                                                                                    | [61]<br><i>Bidarra et al., 2019</i>   |
|            | Plasma | 252 PCa vs 52 Normal<br>AUC = 0.64<br>( $p = 0.0021$ ) | <b>MFS (252 PCa)</b><br>Univariate: Log-rank $p = 0.0206$<br>Multivariate: (Not significant)                                            |                                       |
| Up         | Urine  | (Urine)                                                | (Tissue, 272 PCa)                                                                                                                       | [62]                                  |
|            | Tissue | 47 PCa vs 45 Normal<br>OR = 0.976<br>( $p = 0.717$ )   | <b>Biochemical PFS</b><br>Log-rank $p = 0.026$<br><b>Clinical PFS</b><br>Log-rank $p = 0.043$                                           | <i>Casanova-Salas et al., 2014</i>    |
| Up         | Tissue | (NA)                                                   | <b>BCR-free survival</b> (100 PCa)<br>Univariate OR = 1.91 ( $p = 0.11$ )<br><b>MFS (74 PCa)</b><br>Univariate OR = 1.07 ( $p = 0.93$ ) | [63]<br><i>Wallis et al., 2015</i>    |

AA = African Americans; AUC = Area under the curve; BCR = Biochemical recurrence; BPH = Benign prostatic hyperplasia; EA = European Americans; MFS = Metastatic-free survival; NA = Not applicable; OR = Odds ratio; PFS = Progression-free survival
